## ACKNOWLEDGMENT

The Editor-in-Chief and the Editors of ANESTHESIOLOGY would like to thank the following individuals for their participation in the editorial review process. Their contribution is sincerely appreciated.

- Susan Abdel-Rahman, Pharm.D.  
Basem B. Abdelmalak, M.D.  
John P. Abenstein, M.D.  
Anthony Absalom, M.B., Ch.B.  
Hamid Akbarali, Ph.D.  
Ozan Akca, M.D.  
Hasan B. Alam, M.D.  
Paul H. Alfille, M.D.  
Michael T. Alkire, M.D.  
Paul D. Allen, M.D., Ph.D.  
Armando Almeida, Ph.D.  
David Amar, M.D.  
Eduardo A. Andrade, M.D.  
Martin S. Angst, M.D.  
Joseph F. Antognini, M.D., M.B.A.  
Christian C. Apfel, M.D., Ph.D.  
Valerie A. Arkoosh, M.D., M.P.H.  
William M. Armstead, Ph.D.  
Solomon Aronson, M.D.  
Karim Asehnoune, M.D., Ph.D.  
John A. Auchampach, Ph.D.  
John G. Augoustides, M.D., F.A.S.E.  
David A. August, M.D., Ph.D.  
Michael S. Avidan, M.B., B.Ch.  
Michael F. Aziz, M.D.  
Angela M. Bader, M.D., M.P.H.  
Aranya Bagchi, M.D.  
James M. Bailey, M.D., Ph.D.  
Christophe Baillard, M.D., Ph.D.  
Dusica Bajic, M.D., Ph.D.  
Brian A. Baldo, Ph.D.  
Steven J. Barker, Ph.D., M.D.  
Michael J. Barrington, F.A.N.Z.C.A.  
Jim Bartley, M.B., Ch.B.  
Brian T. Bateman, M.D.  
Victor C. Baum, M.D.  
Jan H. Baumert, M.D., Ph.D.  
Alexander F. Bautista, M.D.  
W. Scott Beattie, M.D., Ph.D.  
Marc Beaussier, M.D., Ph.D.  
Giacomo Bellani, M.D., Ph.D.  
Dan Benhamou, M.D.  
Elliott Bennett-Guerrero, M.D.  
Helene Benveniste, M.D., Ph.D.  
Charles B. Berde, M.D., Ph.D.  
Mitchell F. Berman, M.D., M.P.H.  
Lorenzo Berra, M.D.  
Esther Berrocoso, Ph.D.  
Matthieu BiAIS, M.D.  
Philip E. Bickler, M.D., Ph.D.  
Valerie Billard, M.D.  
Timothy R. Billiar, M.D.  
Stephen M. Black, Ph.D.  
Manfred Blobner, M.D.  
Kenneth D. Bloch, M.D.  
Christoph Blomeyer, M.D.  
James M. Blum, M.D.  
Simon C. Body, M.B., Ch.B.  
Daniel Bolliger, M.D.  
Mélanie Boly, M.D., Ph.D.  
Vincent Bonhomme, M.D.  
Francis Bonnet, M.D.  
Jasenka Borzan, Ph.D.  
Zeljko J. Bosnjak, Ph.D.  
Ansgar M. Brambrink, M.D., Ph.D.  
Gary J. Brenner, M.D., Ph.D.  
Karim Brohi, B.Sc., F.R.C.S.  
David L. Brown, M.D.  
Emery N. Brown, M.D., Ph.D.  
Robert H. Brown, M.D., M.P.H.  
Sorin J. Brull, M.D., F.C.A.R.C.S.I. (Hon)  
Chad M. Brummett, M.D.  
Luc Buée, Ph.D.  
Donal J. Buggy, M.D., M.Sc.  
Alexander J. Butwick, M.B.B.S., F.R.C.A.  
Asokumar Buvanendran, M.D.  
Ian Calder, F.R.C.A.  
Jennifer K. Callaway, Ph.D.  
Javier H. Campos, M.D.  
Keith A. Candiotti, M.D.  
Maxime Cannesson, M.D., Ph.D.  
Xavier Capdevila, M.D., Ph.D.  
Davide Cattano, M.D., Ph.D.  
Vincent W. S. Chan, M.D.  
Wei Chao, M.D., Ph.D.  
Beny Charbit, M.D.  
Jonathan E. Charnin, M.D.  
Lucy L. Chen, M.D.  
Sheng Chen, M.D.  
Wanqiu Chen, Ph.D.  
Peter A. Chin, M.D.  
Hovig Chitilian, M.D.  
Sylvie Chollet-Martini, M.D., Ph.D.  
Bernard P. Cholley, M.D., Ph.D.  
Frances Chung, M.B.B.S., F.R.C.P.C.  
Laura Clark, M.D.  
Robert Coghill, Ph.D.  
Edmond Cohen, M.D.  
Steven P. Cohen, M.D.  
Gary Collins, Ph.D.  
Xavier Combes, M.D.  
Peter F. Conzen, M.D., Ph.D.  
Jeffrey B. Cooper, Ph.D.  
Richard M. Cooper, M.D., F.R.C.P.C.  
Pierre Coriat, M.D.  
Joseph F. Cotton, M.D., Ph.D.  
Edward T. Crosby, M.D., F.R.C.P.C.  
Gregory Crosby, M.D.  
George J. Crystal, Ph.D.  
Deborah J. Culley, M.D.  
Kenneth C. Cummings III, M.D., M.S.  
Gerard F. Curley, M.B., Ph.D.  
Cynthia Czajkowski, Ph.D.  
Edgardo G. D'Angelo, M.D.  
Souhayl Dahmani, M.D., Ph.D.  
Catherine Deeprose, Ph.D.  
Vincent Degos, M.D., Ph.D.  
Giorgio Della Rocca, M.D.  
Stuart W. Derbyshire, Ph.D.  
George Despotis, M.D.  
Philip J. Devereaux, M.D., Ph.D.  
Pascale Dewachter, M.D., Ph.D.  
Franklin Dexter, M.D., Ph.D.  
Gilles Dhonneur, M.D., Ph.D.  
W. Dalton Dietrich, Ph.D.  
Wulf Dietrich, M.D., Ph.D.  
James A. DiNardo, M.D.  
Karen B. Domino, M.D., M.P.H.  
François Donati, Ph.D., M.D.  
Yoel Donchin, M.D.  
Anthony G. Doufas, M.D., Ph.D.  
Patrick M. Dougherty, Ph.D.  
John C. Drummond, M.D., F.R.C.P.C.  
Hugues Duffau, M.D., Ph.D.  
Stephen Duffull, Dip.Pharm., Ph.D.  
Jonathan Dunkman, M.D.  
Marcel E. Durieux, M.D., Ph.D.  
Mathias Dutschmann, Ph.D.  
Richard P. Dutton, M.D.  
Robert H. Dworkin, Ph.D.  
L. Jane Easdown, M.D., F.R.C.P. (C)  
Roderic G. Eckenhoff, M.D.  
Judy Edworthy, Ph.D.  
Edmond I Eger II, M.D.  
Mansoureh Eghbali, Ph.D.  
John H. Eichhorn, M.D.  
Helge Eilers, M.D.  
John H. Eisenach, M.D.  
Douglas J. Eleveld, M.Eng.  
John E. Ellis, M.D.  
Holger K. Eltzschig, M.D., Ph.D.  
Charles W. Emala, M.D.  
Kristin Engelhard, M.D.  
Lars I. Eriksson, M.D., Ph.D.  
Alex S. Evers, M.D.  
Lisa W. Faberowski, M.D.  
John R. Feiner, M.D.  
Jean-Luc Fellahi, M.D., Ph.D.  
John E. Fiadjoe, M.D.  
Roger B. Fillingim, Ph.D.  
Dennis M. Fisher, M.D.  
Edith Fleischmann, M.D.  
Lee A. Fleisher, M.D.  
Alana M. Flexman, M.D.  
Randall P. Flick, M.D.  
Stuart A. Forman, M.D., Ph.D.  
Steven M. Frank, M.D.  
John J. Freiberger, M.D., M.P.H.  
Gyorgy Frendl, M.D.  
Patrick Friederich, M.D.  
Thomas Fuchs-Buder, M.D.  
Jeffrey L. Galinkin, M.D.  
Marcelo Gama de Abreu, M.D., Ph.D.  
Pedro L. Gambús, M.D.  
Tong J. Gan, M.B., F.R.C.A.  
Lene H. Garvey, M.D., Ph.D.  
Ghislaine Gayan-Ramirez, Ph.D.  
Gerald F. Gebhart, M.D., Ph.D.  
Michael Gentile, R.R.T., R.C.P.  
Edward E. George, M.D.  
Peter Gerner, M.D.  
Rona G. Giffard, Ph.D., M.D.  
Ian Gilron, M.D., M.Sc.  
Tony Gin, M.D.  
Adit A. Ginde, M.D., M.P.H.  
Neil R. Gleason, M.D.  
David B. Glick, M.D., M.B.A.  
Anne Godier, M.D.  
Stephanie R. Goodman, M.D.

- Antje Gottschalk, M.D.  
 Eric M. Graham, M.D.  
 Thomas Graven-Nielsen, Ph.D., M.Sc.  
 Robert Greif, M.D., M.M.E.  
 Hilary P. Grocott, M.D., F.R.C.P.C.  
 Mike Grocott, B.Sc., M.D.  
 Michael A. Gropper, M.D., Ph.D.  
 Anil Gupta, M.D., Ph.D.  
 Dhanesh K. Gupta, M.D.  
 Howard B. Gutstein, M.D.  
 Guy S. Haller, M.D., Ph.D.  
 Michael F. Haney, M.D., Ph.D.  
 Stuart R. Hart, M.D.  
 Randolph H. Hastings, M.D., Ph.D.  
 Goran Hedenstierna, M.D.  
 Paul M. Heerd, M.D., Ph.D.  
 Mary M. Heinricher, Ph.D.  
 Judith Hellman, M.D.  
 Jan F. A. Hendrickx, M.D., Ph.D.  
 David L. Hepner, M.D.  
 Dean Hess, Ph.D., R.R.T.  
 Hideyuki Higuchi, M.D.  
 David R. Hillman, M.D.  
 Munetaka Hirose, M.D., Ph.D.  
 Andreas Hoefl, M.D., Ph.D.  
 Alexander Hoetzel, M.D.  
 Christoph K. Hofer, M.D.  
 Maureane Hoffman, M.D., Ph.D.  
 Kirk J. Hogan, M.D.  
 Charles W. Hogue, Jr., M.D.  
 Markus W. Hollmann, M.D., Ph.D.  
 Harriet W. Hopf, M.D.  
 Philip M. Hopkins, B.S., M.D.  
 Hui-Juan Hu, Ph.D.  
 Chun-Jen Huang, M.D., Ph.D.  
 Joanna Q. Hudson, Pharm.D., F.C.C.P.  
 Mark D. Humphries, M.D.  
 Marc A. Huntoon, M.D.  
 Michael J. Iadarola, Ph.D.  
 Fumito Ichinose, M.D.  
 Harald Ihmsen, Ph.D.  
 Brian M. Ilfeld, M.D., M.S.  
 Michael G. Irwin, M.D., F.R.C.A.  
 Teruhiko Ishikawa, M.D.  
 Samir Jaber, M.D., Ph.D.  
 Laurent Jacob, M.D.  
 Michael F. James, Ph.D., F.R.C.A.  
 Leslie C. Jameson, M.D.  
 Michael Jarvis, Ph.D.  
 Vesna Jevtovic-Todorovic, M.D., Ph.D.  
 Ru-Rong Ji, Ph.D.  
 Yandong Jiang, M.D., Ph.D.  
 Denis Jordan, Ph.D.  
 Girish P. Joshi, M.D., M.B.  
 Didier Journois, M.D., Ph.D.  
 Michael J. Joyner, M.D.  
 Robert M. Kacmarek, Ph.D., R.R.T.  
 Zeev N. Kain, M.D., M.B.A.  
 Eijja Kalso, M.D.  
 Jyotshnabala Kanungo, Ph.D.  
 Keyvan Karkouti, M.D., M.Sc.  
 Ira S. Kass, Ph.D.  
 Jonathan D. Katz, M.D.  
 Brian P. Kavanagh, M.B., B.Sc.  
 Henrik Kehlet, M.D., Ph.D.  
 Max B. Kelz, M.D., Ph.D.  
 Steven E. Kern, Ph.D.  
 Evan D. Kharasch, M.D., Ph.D.  
 Hee-Soo Kim, M.D., Ph.D.  
 Oliver Kimberger, M.D.  
 Markus G. Klass, M.D., Ph.D.  
 P. Allan Klock, Jr., M.D.  
 Colleen Koch, M.D., M.S.  
 Eberhard F. Kochs, M.D.  
 Bhavani S. Kodali, M.D.  
 W. Andrew Kofke, M.D., M.B.A.  
 Tatsuro Kohno, M.D., Ph.D.  
 Vincent J. Kopp, M.D.  
 Francis W. Kraemer III, M.D.  
 Janett Kreuziger, M.D.  
 Wolfgang M. Kuebler, M.D., Ph.D.  
 Andrea Kurz, M.D.  
 John G. Laffey, M.D., F.C.A.I.  
 Robert S. Lagasse, M.D.  
 Kathryn G. Lamping, Ph.D.  
 Ruth Landau, M.D.  
 Olivier Langeron, M.D., Ph.D.  
 William L. Lanier, M.D.  
 Merlin D. Larson, M.D.  
 Sigismund Lasocki, M.D., Ph.D.  
 Valerie Lawrence, M.D.  
 H. Thomas Lee, M.D., Ph.D.  
 Jae-Woo Lee, M.D.  
 Lorri A. Lee, M.D.  
 UnCheol Lee, Ph.D.  
 Jean-Yves Lefrant, M.D., Ph.D.  
 Matthieu Legrand, M.D., Ph.D.  
 Hendrikus Lemmens, Ph.D., M.D.  
 Marc Leone, M.D., Ph.D.  
 Jerrold Lerman, M.D., F.R.C.P.C.  
 Kate Leslie, M.B.B.S., M.D.  
 Jacqueline M. Leung, M.D., M.P.H.  
 Jon Levine, M.D., Ph.D.  
 Alan Light, Ph.D.  
 David Liley, Ph.D.  
 Sergei Y. Lopukhin, M.D.  
 Seren H. Loring, M.D., Ph.D.  
 Guy L. Ludbrook, M.B.B.S., Ph.D.  
 Nadia Lunardi, M.D.  
 Carl Lynch III, M.D., Ph.D.  
 Daqing Ma, M.D., Ph.D.  
 Zhengliang Ma, M.D.  
 Alex Macario, M.D., M.B.A.  
 R. Loch Macdonald, M.D., Ph.D.  
 Neil MacIntyre, M.D.  
 M. Bruce MacIver, M.Sc., Ph.D.  
 Christoph Maier, M.D., Ph.D.  
 Tanja Manser, Ph.D.  
 Jianren Mao, M.D., Ph.D.  
 Edward R. Mariano, M.D.  
 Thomas J. Martin, Ph.D.  
 Katherine T. Martucci, Ph.D.  
 Anatoly E. Martynyuk, Ph.D., D.Sc.  
 George A. Mashour, M.D., Ph.D.  
 Joseph P. Mathew, M.D.  
 Bryan G. Maxwell, M.D., M.P.H.  
 C. David Mazer, M.D., F.R.C.P.C.  
 Aurélien Mazeraud, M.D.  
 Timothy J. McCulloch, M.B.B.S., B.Sc.(Med.)  
 David R. McLlroy, M.D., M.Clin.Epi.  
 Christa McIntyre, Ph.D.  
 Jayme McReynolds, Ph.D.  
 Sandro Mecozzi, Ph.D.  
 Jens Meier, M.D., Ph.D.  
 Stavros G. Memtsoudis, M.D., Ph.D.  
 Paul M. Mertes, M.D., Ph.D.  
 David Messika-Zeitoun, M.D., Ph.D.  
 Vjekoslav Miletic, Ph.D.  
 Rebecca D. Minehart, M.D.  
 Marek A. Mirski, M.D.  
 Toshiaki Mizobe, M.D., Ph.D.  
 Serge Molliex, M.D., Ph.D.  
 Terri G. Monk, M.D.  
 Iain K. Moppett, D.M., F.R.C.A.  
 Athir H. Morad, M.D.  
 Jonathan Moss, M.D., Ph.D.  
 Manuel Muñoz, Ph.D.  
 Jochen D. Muehlschlegel, M.D., M.M.Sc.  
 Glenn S. Murphy, M.D.  
 David J. Murray, M.D.  
 Guido Musch, M.D.  
 Paul S. Myles, M.B., B.S.  
 Mohamed Naguib, M.B., B.Ch.  
 Carla Nau, M.D.  
 Joseph M. Neal, M.D.  
 Timothy J. Ness, M.D., Ph.D.  
 Mark D. Neuman, M.D., M.Sc.  
 Claus U. Niemann, M.D.  
 MingMing Ning, M.D., M.M.Sc.  
 Koichi Nishikawa, M.D., Ph.D.  
 Thomas D. Nolin, Pharm.D., Ph.D.  
 Ala Nozari, M.D., Ph.D.  
 Gregory A. Nuttall, M.D.  
 Michael F. O'Connor, M.D.  
 Joost J. Oppenheim, M.D.  
 Beverley A. Orser, M.D., Ph.D.  
 Gail Otulakowski, M.D.  
 Alexandre Ouattara, M.D., Ph.D.  
 Nathan L. Pace, M.D., M.Stat.  
 Paul S. Pagel, M.D., Ph.D.  
 Craig M. Palmer, M.D.  
 Susan K. Palmer, M.D.  
 Hui-Lin Pan, M.D., Ph.D.  
 Jonathan Z. Pan, Ph.D., M.D.  
 Peter H. Pan, M.D.  
 Pratik Pandharipande, M.D., M.S.C.I.  
 Narayanan Parameswaran, B.V.Sc., Ph.D.  
 Manuel C Pardo, M.D.  
 Gavril W. Pasternak, M.D., Ph.D.  
 Hemal H. Patel, M.D.  
 Sanjay R. Patel, M.D., M.S.  
 Catherine Paugam-Burtz, M.D., Ph.D.  
 Jean-Francois Payen, M.D., Ph.D.  
 Ronald G. Pearl, M.D., Ph.D.  
 Frederick M. Perkins, M.D.  
 Misha Perouansky, M.D.  
 Antti Pertovaara, M.D., Ph.D.  
 Christopher M. Peters, Ph.D.  
 Andrey B. Petrenko, M.D., Ph.D.  
 Charles R. Phillips, M.D.  
 May C. M. Pian-Smith, M.D.  
 Reuven Pizov, M.D.  
 Emmanuel Planel, Ph.D.  
 Gilles Plourde, M.D., M.Sc.  
 Esther M. Pogatzki-Zahn, M.D.  
 Karen L. Posner, Ph.D.  
 Arun Prakash, M.D., Ph.D.  
 Hans-Joachim Priebe, M.D.  
 Alexander Proekt, M.D., Ph.D.  
 Kane O. Pryor, M.D.  
 Gail J. Pyne-Geithman, D.Phil.

- Lee J. Quinton, Ph.D.  
 Sadeq A. Quraishi, M.D., M.H.A.  
 Douglas E. Raines, M.D.  
 Satya Krishna Ramachandran, M.D., F.R.C.A.  
 Lars S. Rasmussen, M.D., Ph.D.  
 Phillip Rauk, M.D.  
 Ke Ren, Ph.D., M.D.  
 Mark M. Rich, M.D., Ph.D.  
 Philippe Richebe, M.D., Ph.D.  
 Torsten Richter, M.D.  
 Matthias L. Riess, M.D., Ph.D.  
 Jacques Ripart, M.D., Ph.D.  
 Cyril Rivat, Ph.D.  
 Ricardo Riveros-Perez, M.D.  
 Reitze Rodseth, F.C.A.(S.A.)  
 Mark D. Rollins, M.D., Ph.D.  
 E. Alfonso Romero-Sandoval, M.D., Ph.D.  
 Richard W. Rosenquist, M.D.  
 Carl E. Rosow, M.D., Ph.D.  
 David M. Roth, M.D., Ph.D.  
 Steven Roth, M.D.  
 Brian Rothman, M.D.  
 Marc A. Rozner, Ph.D., M.D.  
 Uwe Rudolph, M.D.  
 James A. Russell, M.D.  
 Meyer M. Samama, M.D., Pharm.D.  
 Satwant K. Samra, M.D.  
 Warren S. Sandberg, M.D., Ph.D.  
 Robert D. Sanders, B.Sc., M.B.B.S.  
 Constantine D. Sarantopoulos, M.D., Ph.D.  
 Richa Saxena, Ph.D.  
 Barbara M. Scavone, M.D.  
 Achim Schmidtke, M.D., Ph.D.  
 Gerhard Schneider, M.D.  
 Mark E. Schroeder, M.D.  
 Armin Schubert, M.D., M.B.A.  
 Jo El J. Schultz, Ph.D.  
 Marcus J. Schultz, M.D., Ph.D.  
 Rainer Schulz, M.D.  
 Mark A. Schumacher, Ph.D., M.D.  
 William A Schumacher, Ph.D.  
 Jurgen Schuttler, M.D.  
 Stephan K. W. Schwarz, M.D., Ph.D.  
 Phillip E. Scuderi, M.D.  
 John Sear, M.B.B.S., Ph.D.  
 Margaret M. Sedensky, M.D.  
 Frédérique S. Servin, M.D.  
 Christoph N. Seubert, M.D., Ph.D.  
 Muhammad I. Shaikh, M.D., Ph.D.  
 Reza Shaker, M.D.  
 Aryeh Shander, M.D., F.C.C.M.  
 Kodali B. Shankar, M.D.  
 Stanton Shernan, M.D.  
 Kevin N. Sheth, M.D.  
 Wenzhu Shi, M.D.  
 Linda Shore-Lesserson, M.D.  
 Timothy G. Short, M.D.  
 Jeffrey H. Silverstein, M.D.  
 Patrick Sips, Ph.D.  
 Nikolaos J. Skubas, M.D.  
 Robert N. Sladen, M.D.  
 William Slikker, Ph.D.  
 Peter D. Slinger, M.D.  
 Tod B. Sloan, M.D., Ph.D.  
 Richard M. Smiley, M.D., Ph.D.  
 Ken Solt, M.D.  
 Sulpicio G. Soriano, M.D.  
 Donat R. Spahn, M.D., F.R.C.A.  
 Claudia D. Spies, M.D.  
 Anna Stadnicka, Ph.D.  
 Philip F. Stahel, M.D.  
 Donald R. Stanski, M.D.  
 Randolph H. Steadman, M.D.  
 Jacob Steinmetz, M.D., Ph.D.  
 Thomas A. Stekiel, M.D.  
 Marc P. Steurer, M.D., D.E.S.A.  
 Markus F. Stevens, M.D., D.E.A.A.  
 David A. Story, M.D., F.A.N.Z.C.A.  
 David F. Stowe, M.D., Ph.D.  
 Kathryn M. Stowell, Ph.D.  
 Robert A. Strickland, M.D.  
 David P. Strum, M.D., F.R.C.P.C.  
 Michel M. R. F. Struys, M.D., Ph.D.  
 Astrid G. Stucke, M.D.  
 Eckehard A. E. Stuth, M.D.  
 Balachundhar Subramaniam, M.B.B.S., M.D.  
 Sang Won Suh, M.D.  
 Christer H. Svensen, M.D., Ph.D.  
 Madhav Swaminathan, M.D., F.A.S.E.  
 BobbieJean Sweitzer, M.D.  
 Francois Sztark, M.D., Ph.D.  
 Daniel Talmor, M.D., M.P.H.  
 Rene Tempelhoff, M.D.  
 Richard Teplick, M.D.  
 Nicolas Terzi, M.D., Ph.D.  
 John E. Tetzlaff, M.D.  
 Julien Textoris, M.D.  
 Lorenz G. Theiler, M.D.  
 Dick Tibboel, M.D., Ph.D.  
 Patrick Tighe, M.D.  
 Serge Timsit, M.D., Ph.D.  
 Joseph D. Tobias, M.D.  
 Dan Tolpin, M.D.  
 Ashley Tonidandel, M.D.  
 Michael Tortorici, Pharm.D., Ph.D.  
 Irene Tracey, Ph.D.  
 Kevin J. Tracey, M.D.  
 Kevin K. Tremper, Ph.D., M.D.  
 Lawrence C. Tsen, M.D.  
 Avery Tung, M.D.  
 Julien Valette, Ph.D.  
 Gail A. Van Norman, M.D.  
 John J. Vargo, M.D., M.P.H.  
 Theodoros Vassilakopoulos, Ph.D.  
 Susan T. Verghese, M.D.  
 Robert A. Veselis, M.D.  
 Marcos F. Vidal Melo, M.D., Ph.D.  
 Helena L. A. Vieira, Ph.D.  
 Benoit Vivien, M.D., Ph.D.  
 David B. Waisel, M.D.  
 Cheng Wang, M.D., Ph.D.  
 Christopher Ward, M.D.  
 Denham S. Ward, M.D., Ph.D.  
 David O. Warner, M.D.  
 Mark A. Warner, M.D.  
 Mehernoor F. Watcha, M.D.  
 Scott Watkins, M.D.  
 Nigel Webster, Ph.D.  
 Denise J. Wedel, M.D.  
 Guy L. Weinberg, M.D.  
 Avi A. Weinbroum, M.D.  
 Richard B. Weiskopf, M.D.  
 Robert Weller, M.D.  
 Duminda N. Wijeyesundera, M.D., Ph.D.  
 George L. Wilcox, Ph.D.  
 Harvey J. Woehlck, M.D.  
 Jean Wong, M.D., F.R.C.P.C.  
 Christopher L. Wu, M.D.  
 Hannah Wunsch, M.D., M.Sc.  
 Zhongcong Xie, M.D., Ph.D.  
 Zhen-Zhong Xu, Ph.D.  
 Tony L. Yaksh, Ph.D.  
 Michiaki Yamakage, M.D., Ph.D.  
 Jay Yang, M.D., Ph.D.  
 David Yarnitsky, M.D.  
 Arvi Yli-Hankala, M.D., Ph.D.  
 Roger C. Young, M.D., Ph.D.  
 Sloan C. Youngblood, M.D.  
 Venetia Zachariou, Ph.D.  
 Michael Zaugg, M.D., M.B.A.  
 John H. Zhang, M.D., Ph.D.  
 Jun-Ming Zhang, M.D., M.Sc.  
 Jie Zhou, M.D., M.B.A.  
 Armin Zittermann, M.D.
